# Supplementary material
Source: publisher figshare collection journal article supplement (https://acs.figshare.com/ndownloader/files/17385809)
Supplement: Supplementary file 1 [file 17385809]

## **Supplementary Information**

# **Asymmetric Spatial Power Dividers Using Phase-Amplitude Metasurfaces Driven By Huygens**

## **Principle:**

Hamid Rajabalipanah, Ali Abdolali\*, Javad Shabanpour, Ali Momeni, Ahmad Cheldavi

*Iran University of Science and Technology, Electrical Engineering, Narmak, Tehran, IR 16846-*

*13114.*

[\\*abdolali@iust.ac.ir](mailto:*abdolali@iust.ac.ir)

The goal of this supplementary material is to explain further details that are not explained in the paper.

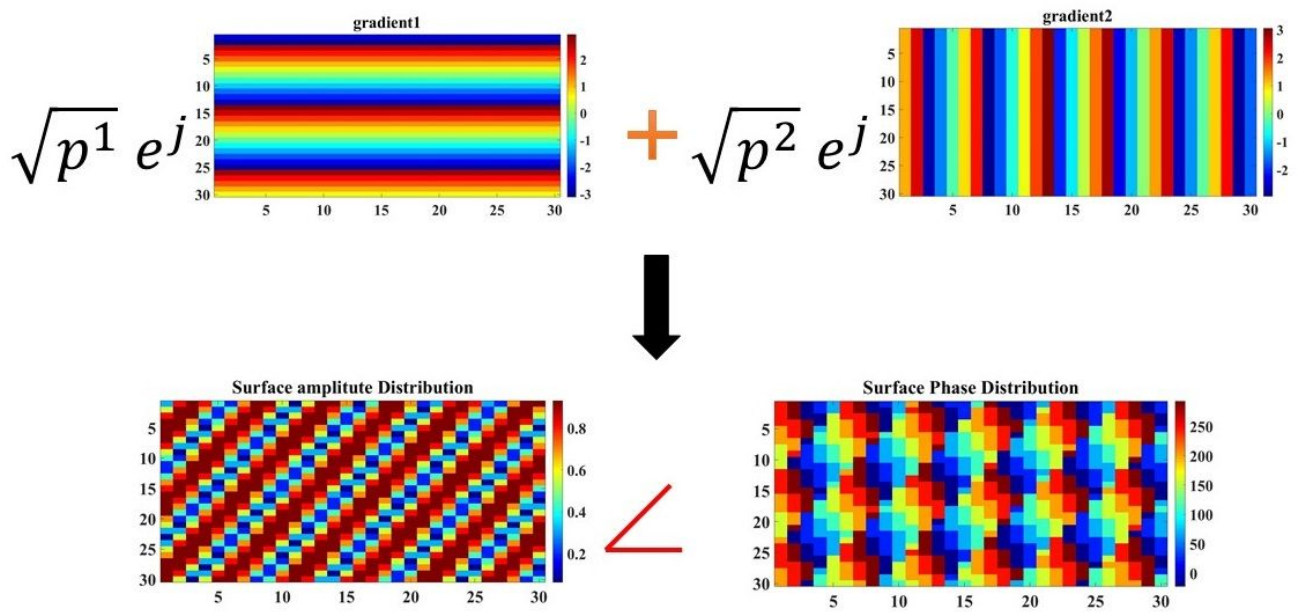

**Figure S1.** The phase and amplitude distributions of the contributing metasurfaces to the superposition principle for designing the ASPD metasurface of Figure 9 (a).

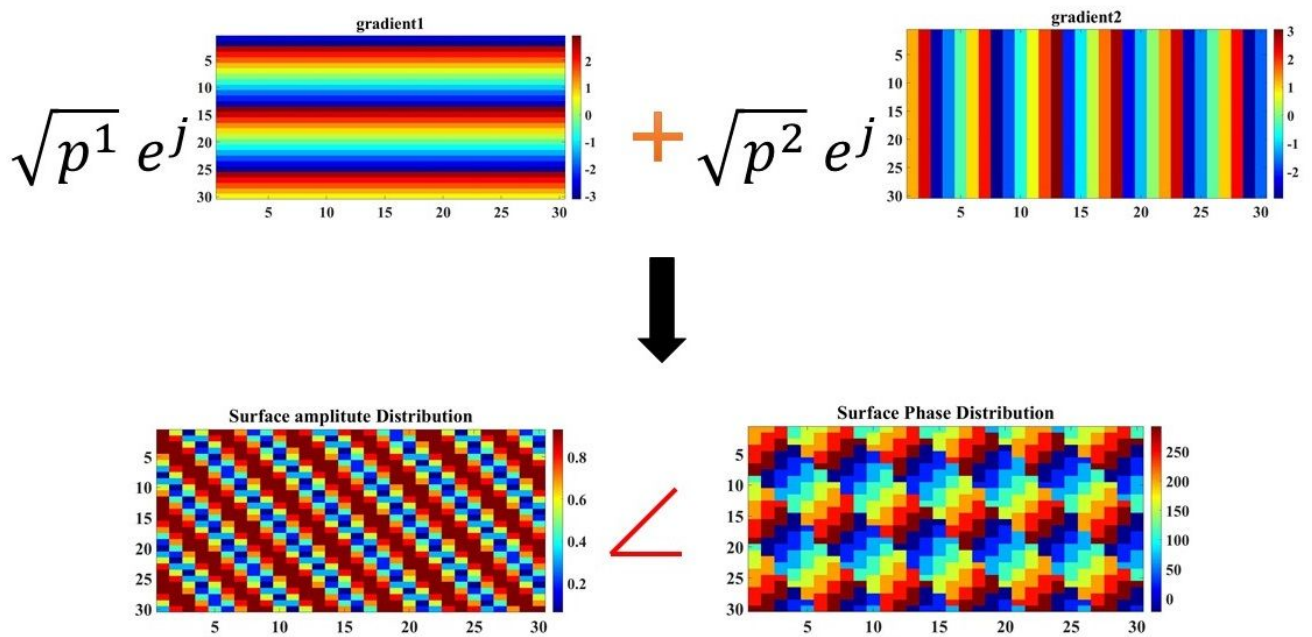

**Figure S2.** The phase and amplitude distributions of the contributing metasurfaces to the superposition principle for designing the ASPD metasurface of Figure 9 (c).

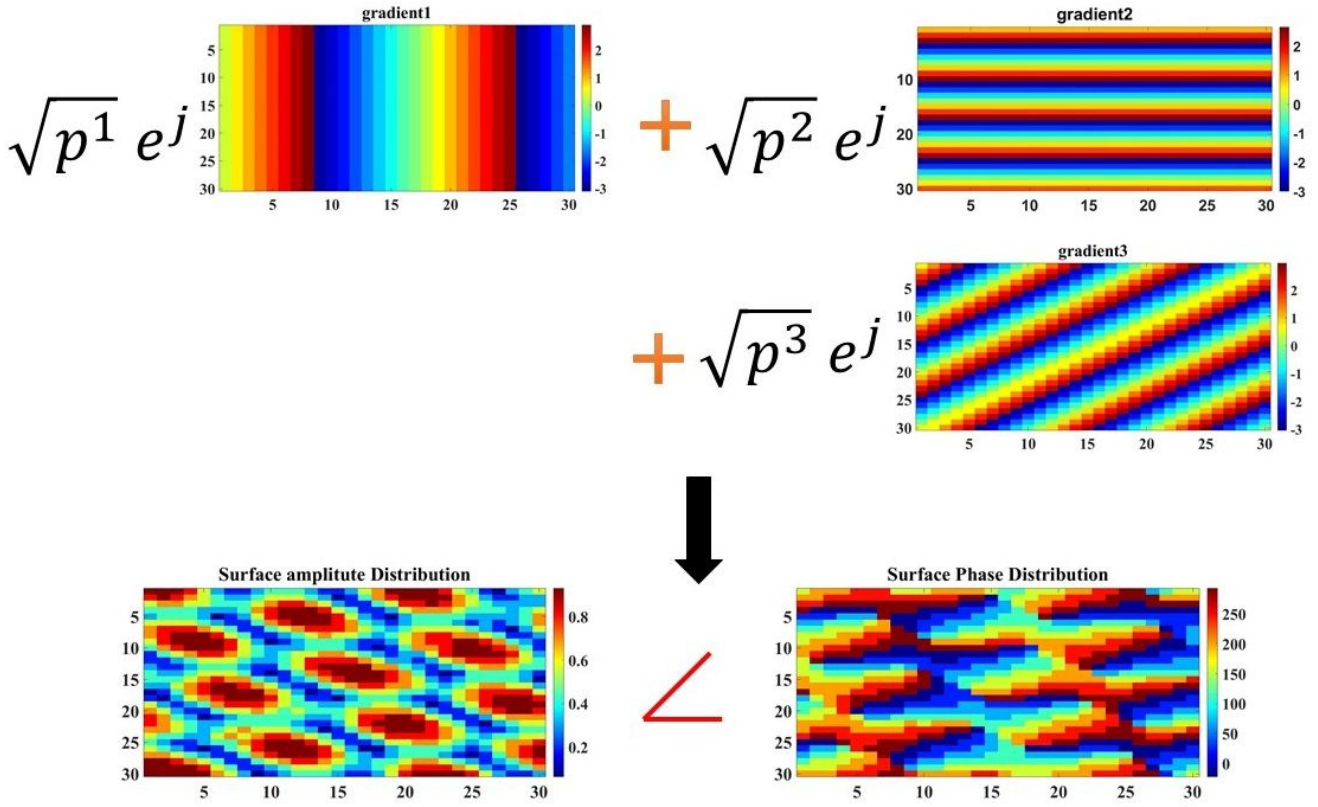

**Figure S3.** The phase and amplitude distributions of the contributing metasurfaces to the superposition principle for designing the ASPD metasurface of Figure 9 (e).

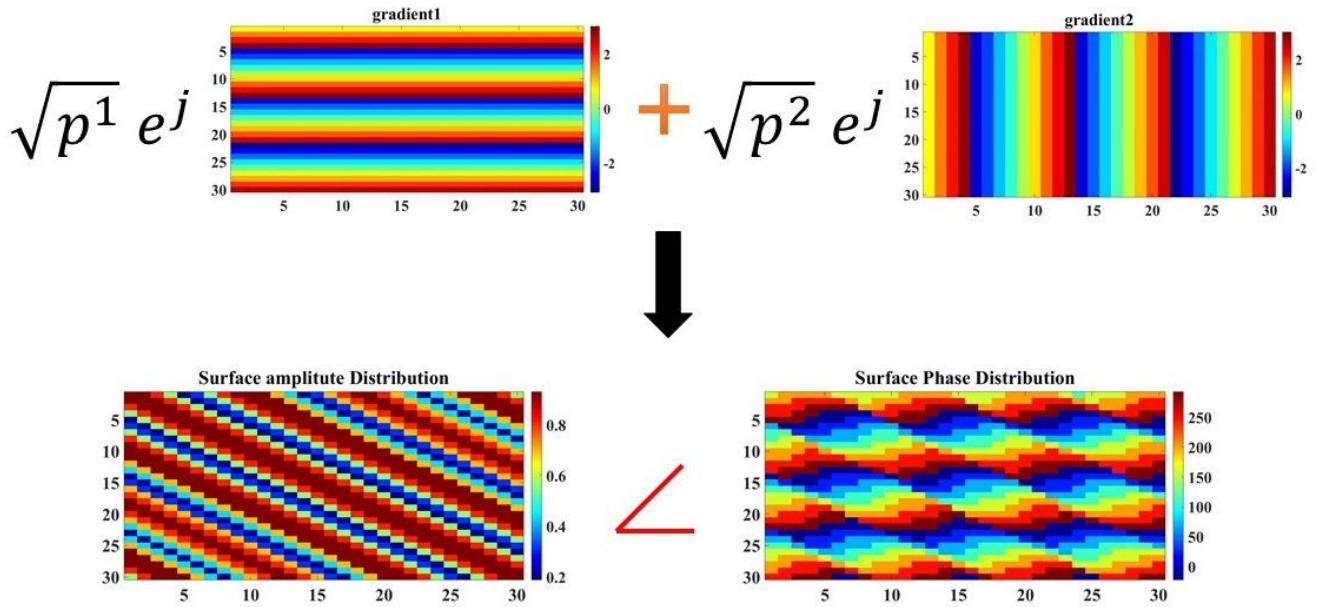

**Figure S4.** The phase and amplitude distributions of the contributing metasurfaces to the superposition principle for designing the ASPD metasurface of Figure 10 (a).

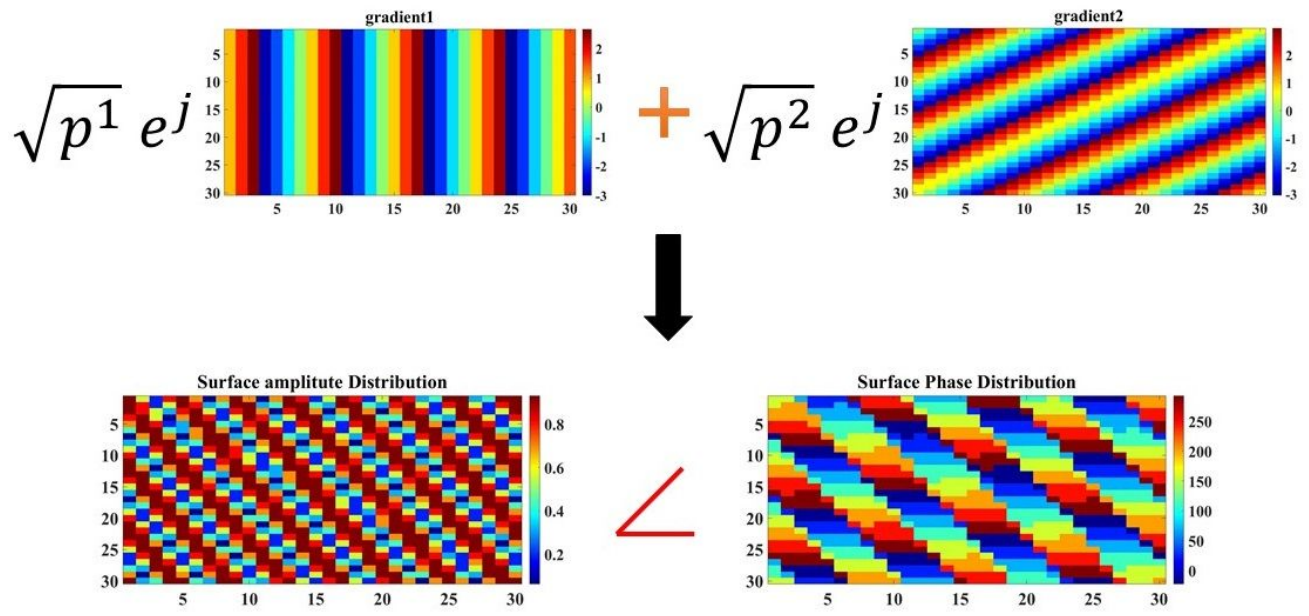

**Figure S5.** The phase and amplitude distributions of the contributing metasurfaces to the superposition principle for designing the ASPD metasurface of Figure 10 (c).
